# Supplementary material for: Towards a Treatment for Neuroinflammation in Epilepsy: Interleukin-1 Receptor Antagonist, Anakinra, as a Potential Treatment in Intractable Epilepsy
Source: MDPI journal article supplement (doi:10.3390/ijms22126282), 2021-06-11
Supplement: s1 [file s1]

| Case | n/Ref.  | Onset age (years) | Gender | ASM                                                       | Special additions              | Sz onset to anakinra (days) | Anakinra dose (mg/kg/day)                          | Anakinra duration (days) | >50% Sz reduction |
|------|---------|-------------------|--------|-----------------------------------------------------------|--------------------------------|-----------------------------|----------------------------------------------------|--------------------------|-------------------|
| 1    | 1/[11]  | 2y8m              | ND     | PB, LCM, TPM, PRP, Felbamate, KETA, LEV, PHT, CZP         | steroid, KD                    | 6-23, 54-190                | 5 mg/kg twice daily                                | 190<                     | yes               |
| 2    | 1/[35]  | 10y               | ND     | MDZ, PHT, PRP, TH, PB, LEV, TPM, LCM, CLB, KETA, OXC, PER | IVIg, steroid, KD              | 540                         | 2.5 mg/kg per day (100 mg) → 2.5 mg/kg twice a day | 7 months                 | yes               |
| 3    | 2/[36]  | 9y                | M      | PB, CBD, MDZ, KETA                                        | KD, CMN-DBS                    | 43                          | titrated up to 5 mg/kg/day                         | 15 months <              | yes               |
| 4    |         | 5y                | M      | PB, MDZ, TH, KETA, CBD                                    | KD, CMN-DBS                    | 22                          | titrated up to 10 mg/kg/day                        | 3 months                 | no                |
| 5    | 1/[37]  | 21y               | F      | BZD, LEV, LCM, PENT, PRP, MDZ, KETA, CLB, PER             | IVIg, steroid, KD              | 32                          | 100 mg three times daily                           | 1 year                   | yes               |
| 6    | 1/[38]  | 6y                | M      | LEV, PHT, PB, MDZ, KE, PENT, VPA, TPM, CBD, LZP           | IVIg, steroid, Tocilizumab, KD | d6                          | titrated to 20 mg/kg/day                           | 15 days                  | no                |
| 7    | 1/[39]  | 6y                | F      | LEV, PHT, PB, TPM, LCM, PENT, MDZ, CBD, LID,              | IVIg, steroid, KD              | 24                          | 100 mg twice daily                                 | 1 yrs<                   | yes               |
| 8    | 25/[41] | 5.6               | M      | MDZ, PENT, LID, KE                                        | IVIg, steroid, KD              | 17                          | 10 mg/kg/day                                       | 1 day                    | yes               |
| 9    |         | 9                 | M      | MDZ, PENT, LID, CBD, DBS                                  | IVIg, steroid, PE, KD          | 42                          | 4 mg/kg/day                                        | > 114 days               | no                |
| 10   |         | 5                 | M      | MDZ, PENT, LID, KE, CBD, DBS                              | IVIg, steroid, PE, KD          | 21                          | 10 mg/kg/day                                       | > 124 days               | no                |
| 11   |         | 11                | M      | MDZ, PENT, KE,                                            | IVIg, steroid, PE, KD, HYPO    | 14                          | 12.2 mg/kg/day                                     | 83 days                  | yes               |
| 12   |         | 11                | F      | MDZ, PENT, KE                                             | IVIg, steroid, KD              | 19                          | 3 mg/kg/day                                        | -                        | yes               |
| 13   |         | 5                 | M      | MDZ, PENT, VNS, ISO                                       | IVIg, steroid, PE, KD, HYPO,   | 18                          | 4.7 mg/kg/day                                      | 2 days                   | -                 |
| 14   |         | 5                 | F      | MDZ, PENT, LID, KE                                        | IVIg, steroid, KD              | 24                          | 13 mg/kg/day                                       | -                        | -                 |
| 15   |         | 7                 | M      | MDZ, PENT, KETA                                           | IVIg, steroid, KD              | 50                          | 6.3 mg/kg/day                                      | 330 days                 | -                 |
| 16   |         | 12                | M      | MDZ, PENT, PRP, KE, CBD                                   | IVIg, steroid, KD              | 20                          | 10 mg/kg/day                                       | 350 days                 | -                 |
| 17   |         | 8                 | M      | MDZ, PENT, KE                                             | IVIg, steroid, KD, HYPO        | 23                          | 2 mg/kg/day                                        | 7 days                   | -                 |
| 18   |         | 11                | F      | MDZ, PENT, PRP, KE                                        | IVIg, KD                       | 9                           | 8 mg/kg/day                                        | 26 days                  | yes               |
| 19   |         | 9                 | F      | MDZ, PENT                                                 | IVIg, steroid, rituximab       | 15                          | 3.3 mg/kg/day                                      | 14 days                  | -                 |
| 20   |         | 6                 | F      | MDZ, PENT                                                 | KD                             | d5                          | 10 mg/kg/day                                       | 16 days                  | -                 |

|    |  |    |   |                    |                                    |     |               |          |     |
|----|--|----|---|--------------------|------------------------------------|-----|---------------|----------|-----|
| 21 |  | 9  | M | MDZ, PENT          | IVIg, steroid, rituximab, KD, HYPO | d20 | 5 mg/kg/day   | 120 days | yes |
| 22 |  | 6  | M | PENT               | IVIg, steroid, PE                  | d32 | 7 mg/kg/day   | 252 days | yes |
| 23 |  | 15 | M | MDZ, PENT          | IVIg, steroid, PE                  | d25 | 4 mg/kg/day   | 420 days | -   |
| 24 |  | 8  | M | MDZ, PENT, CBD     | IVIg, steroid, HYPO                | d6  | 3.8 mg/kg/day | 9 days   | no  |
| 25 |  | 8  | M | MDZ                | IVIg, steroid, PE, KD              | d20 | 3.2 mg/kg/day | 90 days  | yes |
| 26 |  | 7  | M | PENT               | IVIg, steroid, PE                  | d12 | 7 mg/kg/day   | 270 days | yes |
| 27 |  | 5  | F | PENT, PRP, KE, CBD | IVIg, steroid, PE, rituximab       | d34 | 9 mg/kg/day   | 200 days | yes |
| 28 |  | 14 | F | PENT               | IVIg, steroid, KD                  | d12 | 7.5 mg/kg/day | 183 days | yes |
| 29 |  | 5  | F | PENT, clonidine    | KD                                 | d1  | 4.7 mg/kg/day | 14 days  | -   |
| 30 |  | 16 | F | MDZ, KETA, CBD     | IVIg, steroid, PE, rituximab, KD   | d30 | 2 mg/kg/day   | 97 days  | yes |
| 31 |  | 5  | M | MDZ, PENT, KE      | IVIg, steroid, PE, KD              | d14 | 5 mg/kg/day   | 2 days   | -   |
| 32 |  | 4  | M | MDZ, PENT, KE, CBD | IVIg, steroid, PE, rituximab       | d33 | 5 mg/kg/day   | 5 days   | no  |

Supplemental Table 1 Clinical features and Treatment of Febrile Infection-Related Epilepsy Syndrome

Abbreviations: F, female; M, male; ND, not described ASM, anti-seizure medication; CBD, cannabinoids; cEEG, continuous electroencephalography; DBS, deep brain stimulation; DRESS, drug reaction with eosinophilia and systemic symptoms syndrome; hypothermia, HYPO; Ketamine, KE  
IVIg, intravenous immunoglobulin; isoflurane, ISO; KD, ketogenic diet; LFT, liver function test; MDZ, midazolam; Pentobarbital, PENT, Thiopentone, plasmapheresis, PE TH; Sz, seizure Propofol, PRP Oxcarbazepine, OXC

ND# The individual prognosis is not known but is being considered as a cohort study.

Special additions\* Immune therapy including IVIg, steroid, or CMN-DBS, KD, HYPO, PE
